# Supplementary material
Source: publisher site journal article supplement (https://www.spandidos-publications.com/4224/downloadSupplementary)
Supplement: Supplementary file 1 [file downloadSupplementary]

## Sheet: Sheet1
Table SIV. Clinical parameters in the MN group and healthy control group.
	D, mean	HE, mean	P value
Systolic blood pressure (SBP)	128.22(mmHg)	112.93(mmHg)	0.0026
24h-total urinary protein (Pro-24)	4.74(g/day)	0.068(g/day)	1e-05
estimated glomerular filtration rate(eGFR)	89.41(ml/min/1.73m2)	109.49(ml/min/1.73m2)	0.012
Creatinine (CR)	94.56(μmol/L)	66.80(μmol/L)	0.077
Diastolic blood pressure (DBP)	78.18(mmHg)	75.47(mmHg)	0.47
